# Supplementary material for: NK cell activating receptor ligand expression in lymphangioleiomyomatosis is associated with lung function decline
Source: JCI journal article supplement (doi:10.1172/jci.insight.87270), 2016-10-05
Supplement: sd1 [file 1]

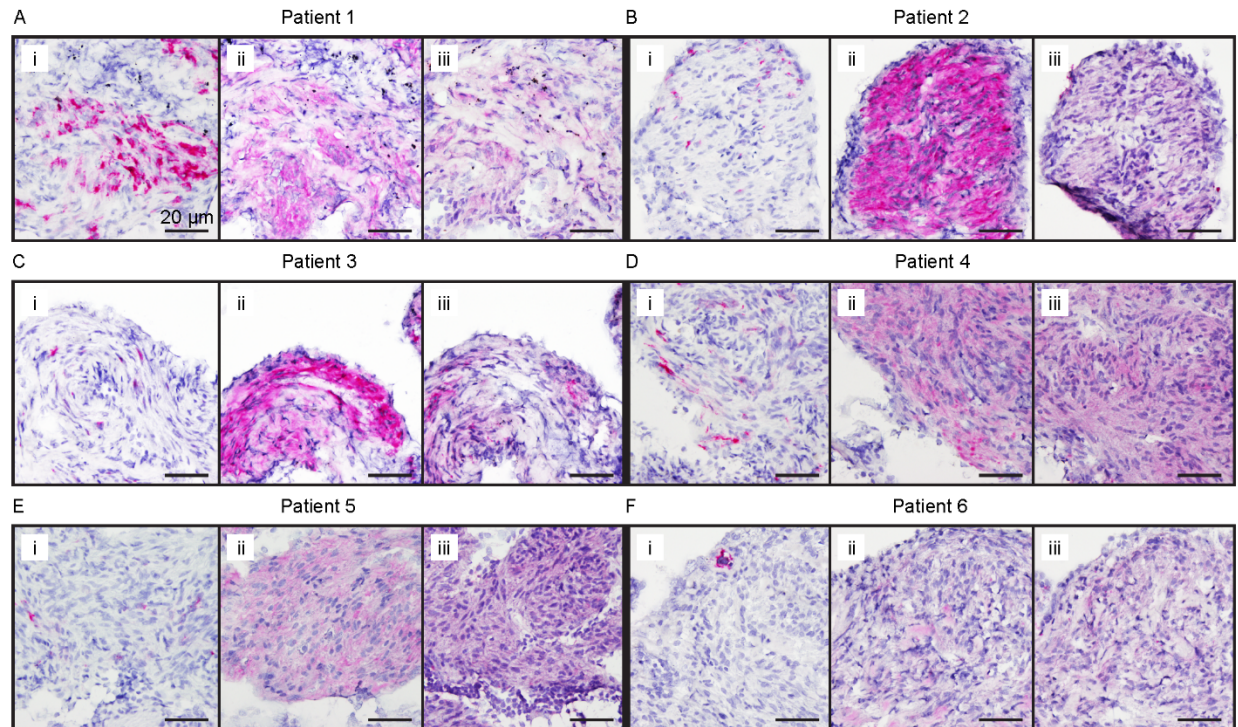

**Supplemental figure 1.** Immunohistochemical analysis of the markers Human melanoma black (HMB-45), alpha-smooth muscle actin ( $\alpha$ -SMA), and the NKG2D ligand ULBP2 in multiple lymphangioleiomyomatosis (LAM) patients. (A-F) For each patient, (i) HMB-45, (ii)  $\alpha$ -SMA, and (iii) ULBP2. Scale bars: 20  $\mu$ m. This figure illustrates immunohistochemical staining of the remaining LAM patients not shown in Figure 1 (n=6).

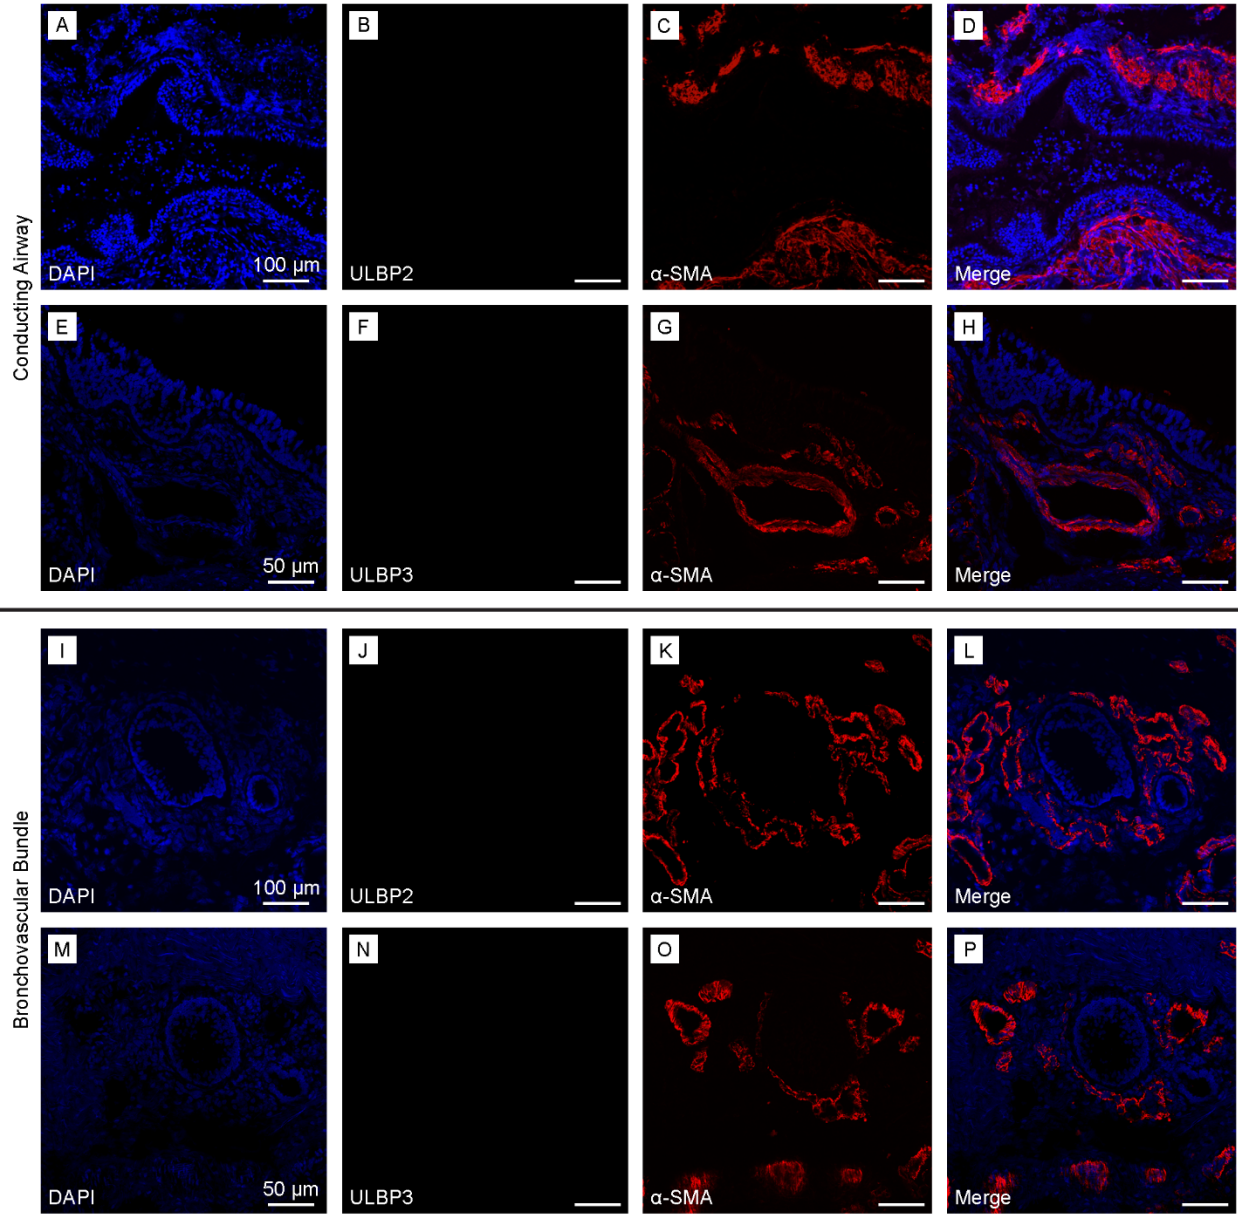

**Supplemental figure 2.** Control staining for immunofluorescent analysis of NKG2D ligands and alpha-smooth muscle actin ( $\alpha$ -SMA) in lymphangiomyomatosis (LAM) lung tissue. (A-P) LAM lung tissue sections (5  $\mu$ m thickness) were stained immunofluorescently for the NKG2D ligands ULBP2 and ULBP3, as well as for the marker  $\alpha$ -SMA. (A-H) Confocal microscopy images of conducting airways and (I-P) bronchovascular bundles located within LAM lung tissue sections. Bronchiolar smooth muscle (C, G) and vascular smooth muscle (K, O) express  $\alpha$ -SMA (red fluorescence). No staining for the NKG2D ligands ULBP2 and ULBP3 was observed in the conducting airway (B, F) or bronchovascular bundle (J, N) tissue sections. (D, H, L, P) Merged images illustrate histopathological localization of DAPI, NKG2D ligands, and  $\alpha$ -SMA in bronchiolar and vascular smooth muscle within tissue sections. (A-D, I-L) Scale bars: 100  $\mu$ m. (E-H, M-P) Scale bars: 50  $\mu$ m.

***Supplemental Table 1: LAM patient demographics***

| <b>Patient</b> | <b>FEV<sub>1</sub> (L)</b> | <b>% FEV<sub>1</sub><br/>predicted</b> | <b>FVC (L)</b> | <b>% FVC<br/>predicted</b> | <b>Age</b> | <b>mTOR<br/>inhibitors</b> |
|----------------|----------------------------|----------------------------------------|----------------|----------------------------|------------|----------------------------|
| 1              | 0.9                        | 34%                                    | 2.84           | 82%                        | 44         | Sirolimus                  |
| 2              | 1.5                        | 53%                                    | 2.51           | 69%                        | 52         | Sirolimus                  |
| 3              | 1.92                       | 70%                                    | 3.0            | 85%                        | 62         | None                       |
| 4              | 2.95                       | 115%                                   | 3.74           | 114%                       | 41         | None                       |
| 5              | 1.48                       | 58%                                    | 2.27           | 68%                        | 48         | None                       |
| 6              | 2.11                       | 62%                                    | 3.54           | 82%                        | 49         | Sirolimus                  |
| 7              | 2.28                       | 84%                                    | 3.64           | 102%                       | 52         | Everolimus                 |
| Average        | 1.88 ± 0.66                | 0.68 ± 0.26                            | 3.08 ± 0.58    | 0.86 ± 0.17                | 49.7 ± 6.7 |                            |
